# Supplementary material
Source: PubMed Central journal article supplement (PMC6338520)
Supplement: NIHMS1510587-supplement-1.pdf [file NIHMS1510587-supplement-1.pdf]

## Supplementary Information Document

### Table of Contents

- 1) List of abbreviations
- 2) Supplementary tables and figures
- 3) Supplementary synthesis schemes

## Supplementary Tables and Figures

| Entry | Sequence               | Enzyme | $k_m$ ( $\mu$ M) | $k_{cat}$ ( $s^{-1}$ ) | $k_{cat}/k_m$ ( $s^{-1}M^{-1}$ ) |
|-------|------------------------|--------|------------------|------------------------|----------------------------------|
| 1     | NAC <sub>20</sub> KKNT | PPT1   | $7.9 \pm 0.9$    | $0.28 \pm 0.01$        | 35,000                           |
|       |                        | APT1   | $6.2 \pm 0.8$    | $0.38 \pm 0.02$        | 61,000                           |
|       |                        | APT2   | $9.4 \pm 0.9$    | $0.199 \pm 0.006$      | 21,000                           |
| 2     | GAC <sub>20</sub> KKNT | PPT1   | $2.0 \pm 0.1$    | $0.28 \pm 0.04$        | 140,000                          |
|       |                        | APT1   | $2.7 \pm 0.3$    | $0.46 \pm 0.01$        | 170,000                          |
|       |                        | APT2   | $5.8 \pm 0.6$    | $0.106 \pm 0.004$      | 18,000                           |
| 3     | WAC <sub>20</sub> KKNT | PPT1   | $12.0 \pm 2.0$   | $0.0063 \pm 0.0004$    | 530                              |
|       |                        | APT1   | $8.9 \pm 2.0$    | $0.027 \pm 0.003$      | 3,300                            |
|       |                        | APT2   | $7.9 \pm 0.7$    | $0.012 \pm 0.004$      | 1,500                            |
| 4     | ASC <sub>20</sub> KKNT | PPT1   | $4.4 \pm 0.5$    | $0.43 \pm 0.02$        | 98,000                           |
|       |                        | APT1   | $1.2 \pm 0.2$    | $0.56 \pm 0.02$        | 470,000                          |
|       |                        | APT2   | $4.8 \pm 0.4$    | $0.29 \pm 0.009$       | 60,000                           |
| 5     | GSC <sub>20</sub> KKNT | PPT1   | $8.2 \pm 0.6$    | $0.41 \pm 0.009$       | 50,000                           |
|       |                        | APT1   | $1.7 \pm 0.3$    | $0.66 \pm 0.02$        | 390,000                          |
|       |                        | APT2   | $5.6 \pm 0.4$    | $0.266 \pm 0.006$      | 48,000                           |
| 6     | WYC <sub>20</sub> KKNT | PPT1   | $4.3 \pm 0.6$    | $0.0078 \pm 0.0003$    | 1,500                            |
|       |                        | APT1   | $8.4 \pm 1.0$    | $0.024 \pm 0.002$      | 2,900                            |
|       |                        | APT2   | $10.0 \pm 2.0$   | $0.0045 \pm 0.0003$    | 450                              |
| 7     | ASC <sub>20</sub> KRNT | PPT1   | $5.7 \pm 0.6$    | $0.90 \pm 0.03$        | 160,000                          |
|       |                        | APT1   | $4.9 \pm 0.7$    | $0.95 \pm 0.04$        | 190,000                          |
|       |                        | APT2   | $5.6 \pm 0.7$    | $0.227 \pm 0.009$      | 41,000                           |
| 8     | GAC <sub>20</sub> KRNT | PPT1   | $7.5 \pm 0.7$    | $0.77 \pm 0.02$        | 100,000                          |
|       |                        | APT1   | $5.9 \pm 0.4$    | $0.64 \pm 0.01$        | 110,000                          |
|       |                        | APT2   | $16.0 \pm 2.0$   | $0.056 \pm 0.003$      | 3,500                            |
| 9     | WYC <sub>20</sub> KRNT | APT1   | $4.4 \pm 0.6$    | $0.044 \pm 0.002$      | 10,000                           |
| 10    | GVC <sub>20</sub> DHNT | APT1   | $14.0 \pm 1.0$   | $0.03 \pm 0.001$       | 2,100                            |
| 11    | DEC <sub>20</sub> WRNT | APT1   | $155 \pm 84$     | $0.003 \pm 0.001$      | 19                               |
|       |                        | APT2   | $91 \pm 73$      | $0.003 \pm 0.001$      | 33                               |
| 12    | GAC <sub>20</sub> AANT | APT1   | $9.0 \pm 3.0$    | $0.016 \pm 0.002$      | 1,800                            |
| 13    | AHC <sub>20</sub> DRNT | PPT1   | $6.7 \pm 0.6$    | $0.054 \pm 0.001$      | 8,060                            |
|       |                        | APT1   | $4.8 \pm 0.7$    | $0.163 \pm 0.007$      | 34,000                           |
|       |                        | APT2   | $5.3 \pm 0.5$    | $0.00259 \pm 0.00008$  | 490                              |
| 14    | PAC <sub>20</sub> EANT | APT1   | $23 \pm 8$       | $0.0022 \pm 0.0003$    | 97                               |
| 15    | SYC <sub>20</sub> IANT | APT1   | $23 \pm 4$       | $0.040 \pm 0.003$      | 1,700                            |
| 16    | ADC <sub>20</sub> SRNT | PPT1   | $11 \pm 6$       | $0.012 \pm 0.002$      | 1,090                            |
|       |                        | APT1   | $7 \pm 1$        | $0.031 \pm 0.002$      | 4,400                            |
| 17    | FSC <sub>20</sub> RANT | PPT1   | $42 \pm 25$      | $0.007 \pm 0.002$      | 170                              |
|       |                        | APT1   | $59 \pm 19$      | $0.036 \pm 0.006$      | 610                              |
| 18    | FRC <sub>20</sub> KANT | PPT1   | $2.3 \pm 0.4$    | $0.032 \pm 0.002$      | 14,000                           |
|       |                        | APT1   | $1.7 \pm 0.1$    | $0.226 \pm 0.006$      | 130,000                          |
|       |                        | APT2   | $2.7 \pm 0.3$    | $0.062 \pm 0.003$      | 23,000                           |

**Table S1. Catalytic properties of APTs, for the hydrolysis of fluorogenic peptides, Related to figures 3 and 5.** Amino acid substitutions at positions P2, P1, P1' and P2' are in red letters.

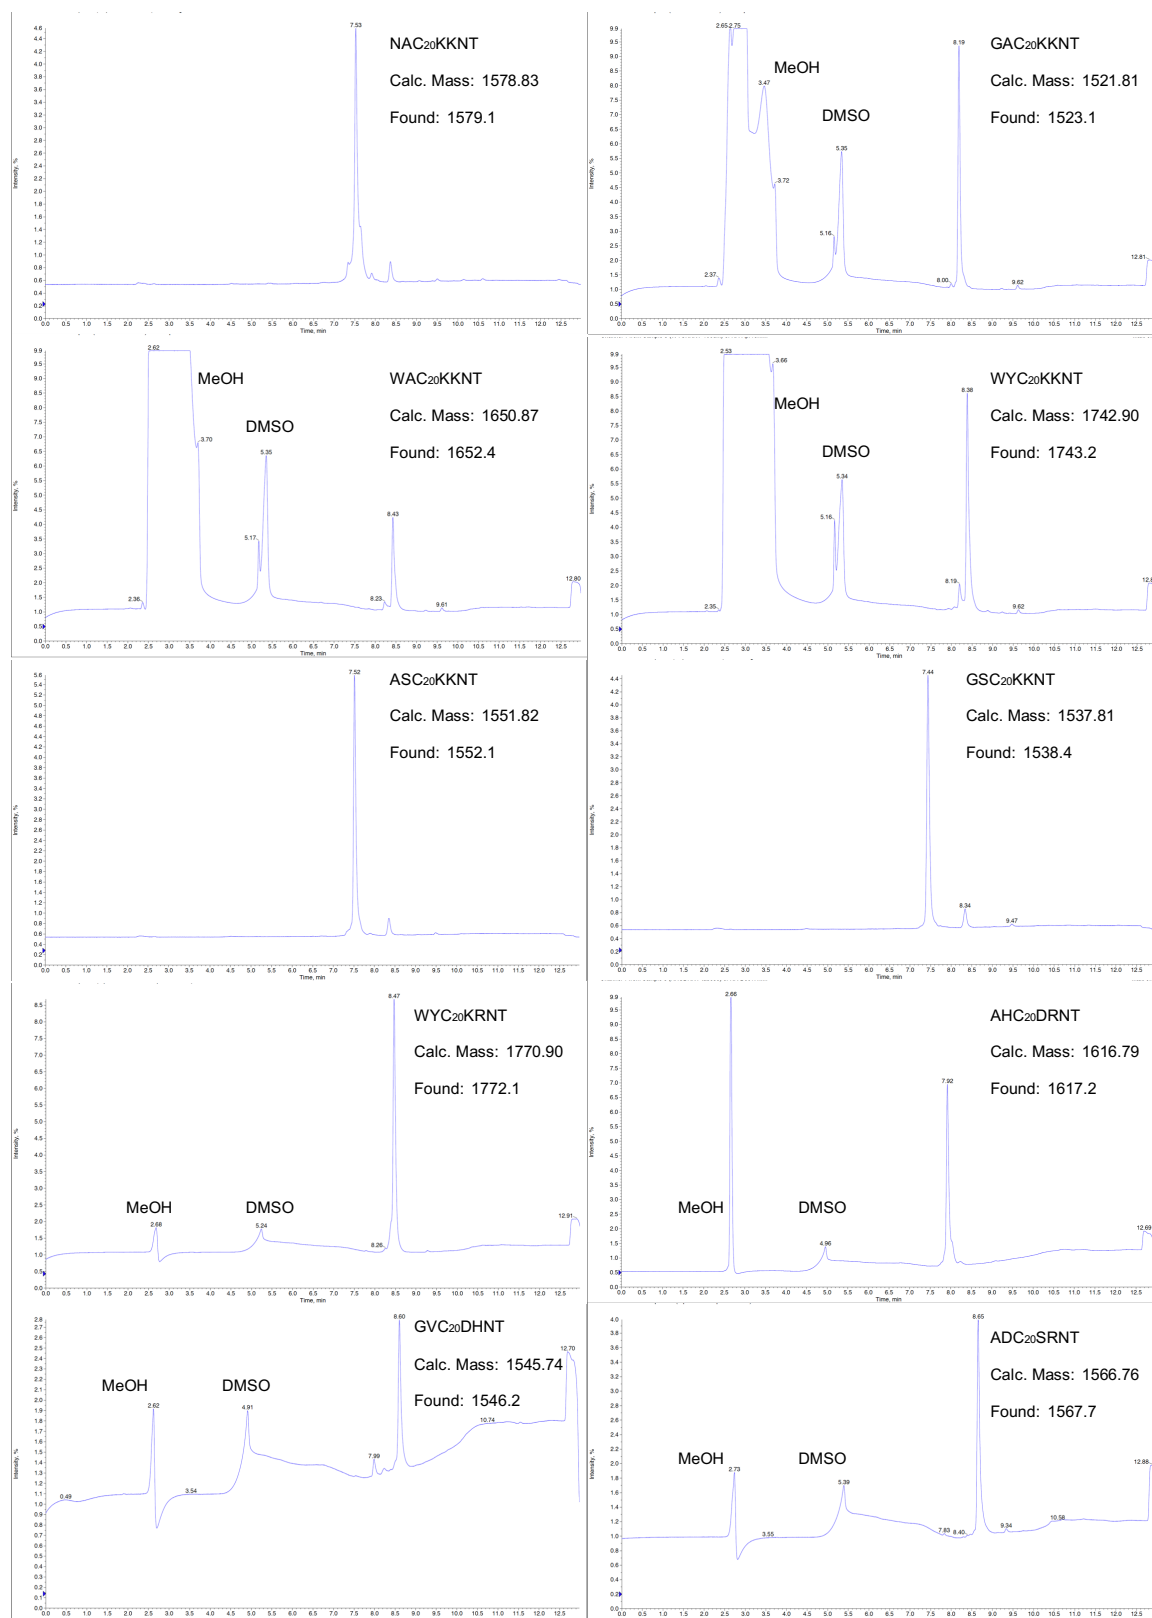

**Figure S1. Characterization of fluorogenic peptides, Related to figures 3 and 5.** HPLC purified peptides were characterized by LCMS, UV traces are measured at a wavelength of 220 nm.  $[M+H]^+$  parent ions as well as  $[M+2H]^{2+}$  were compared to calculated masses.

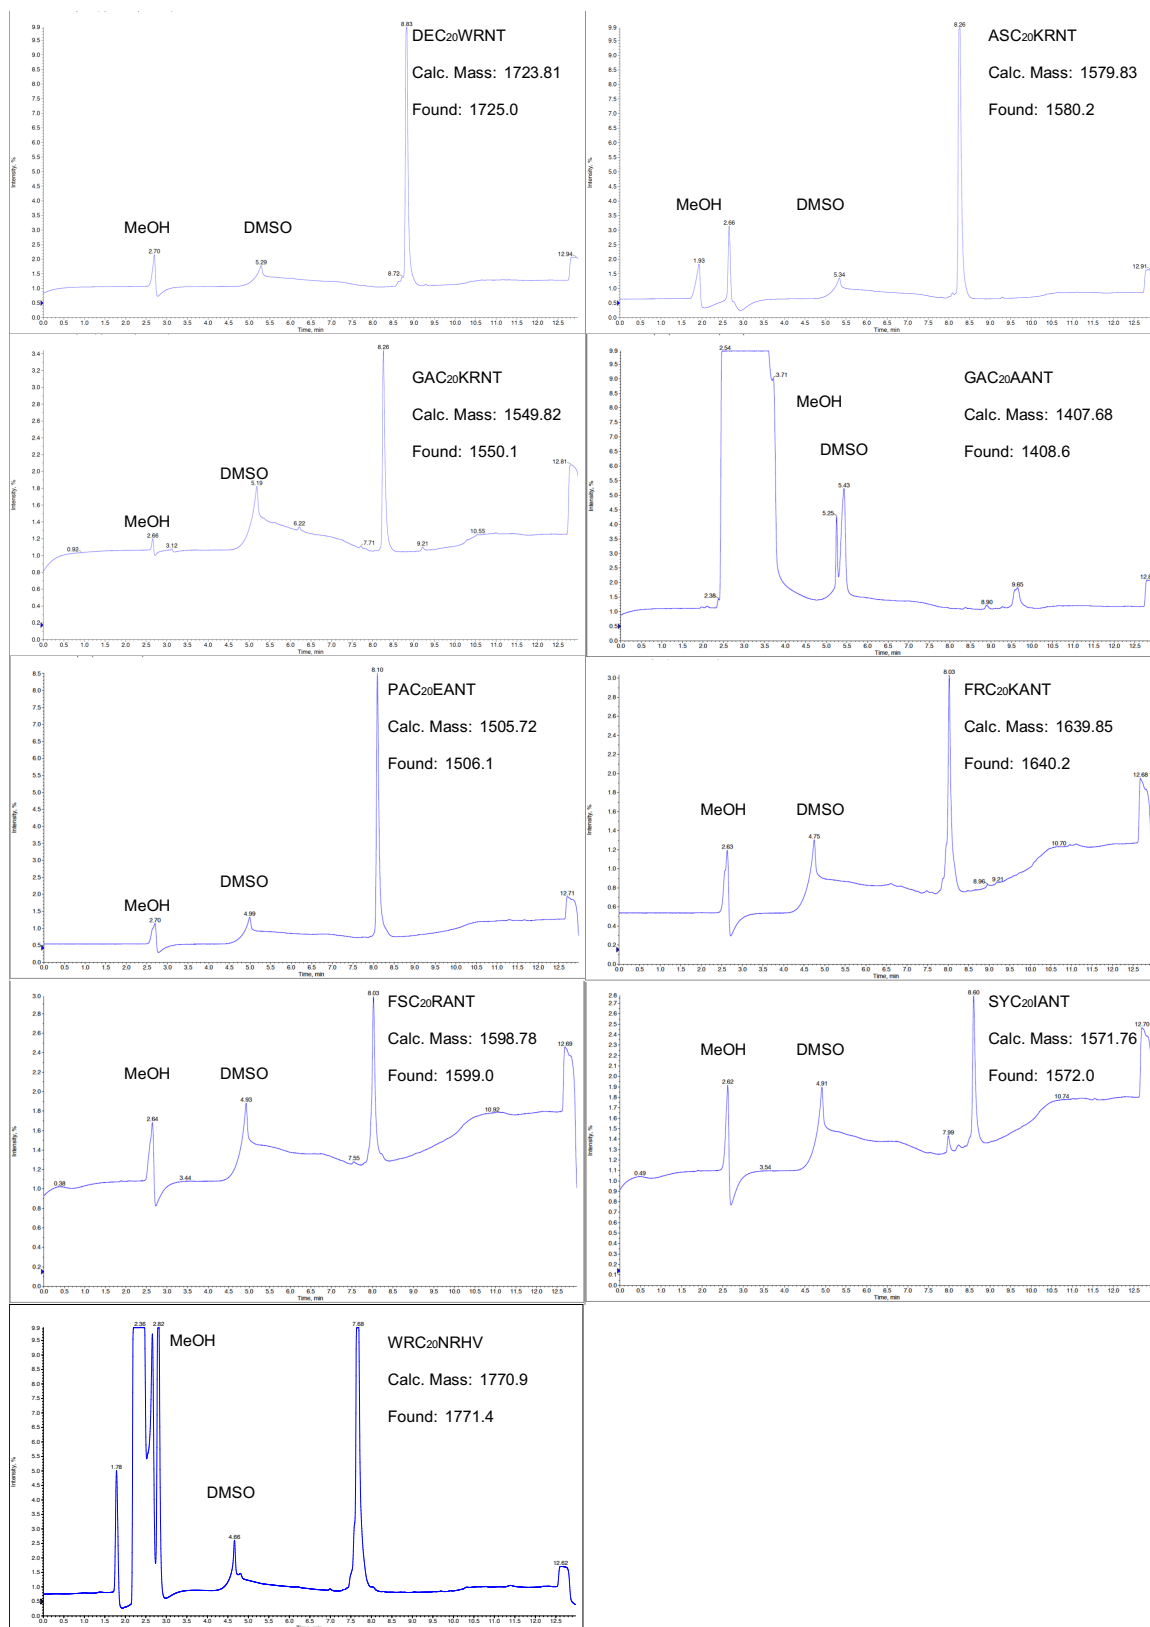

**Figure S2. Characterization of fluorogenic peptides, Related to figures 3 and 5.** HPLC purified peptides were characterized by LCMS, UV traces are measured at a wavelength of 220 nm.  $[M+H]^+$  parent ions as well as  $[M+2H]^{2+}$  were compared to calculated masses.

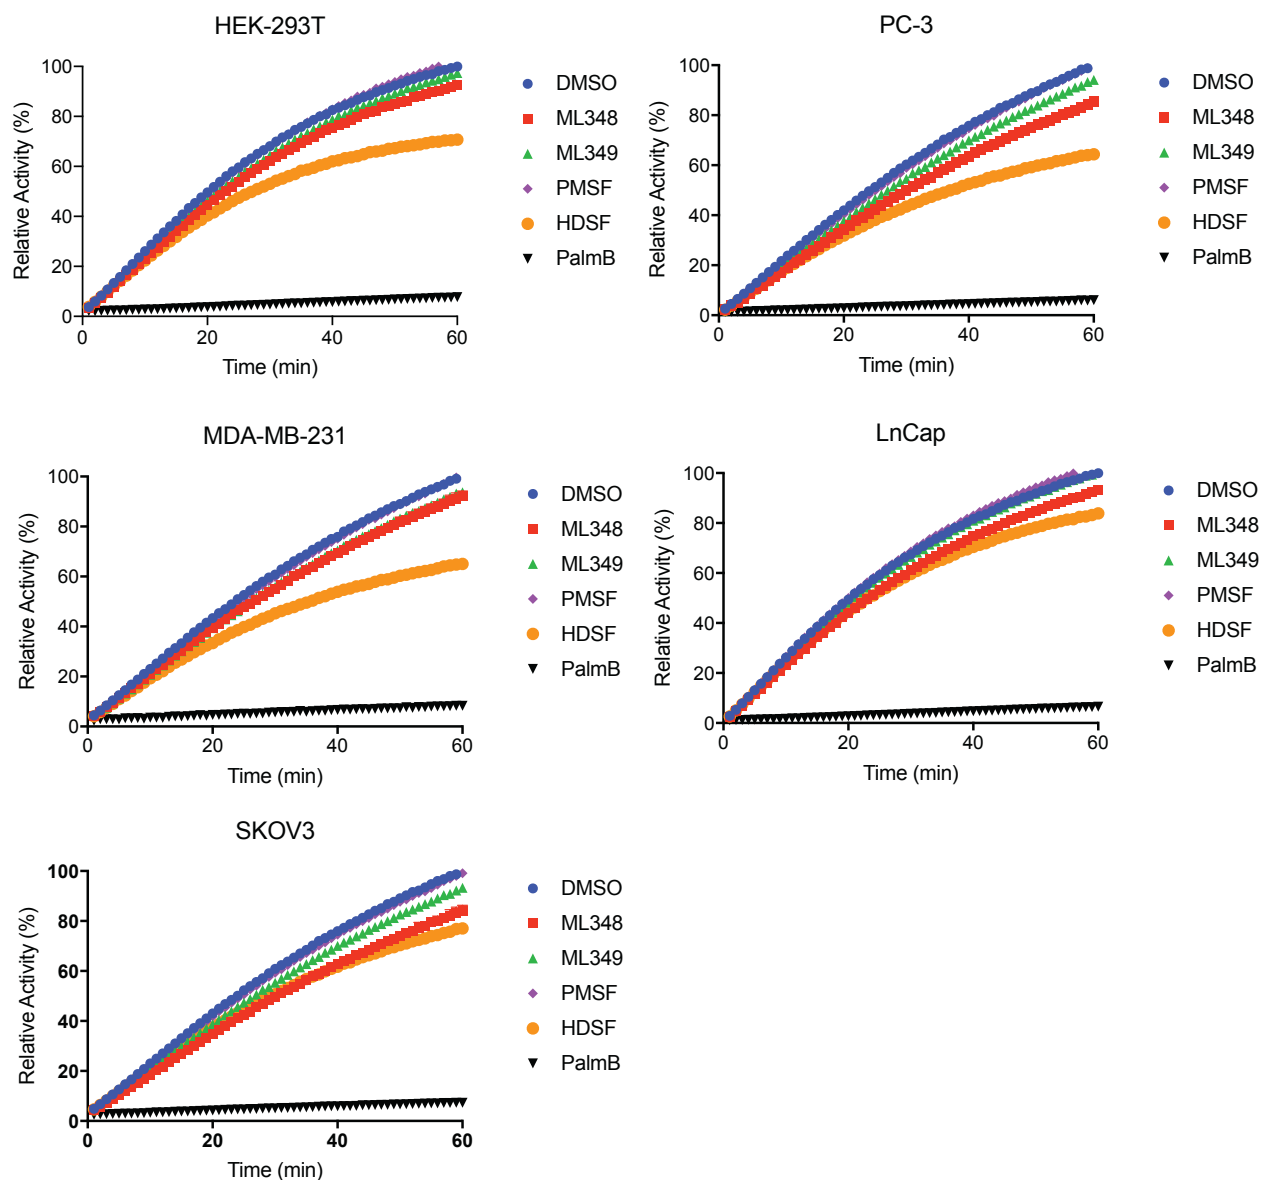

**Figure S3. Depalmitoylase activity in cell lysates can be interrogated with selective inhibitors, Related to figure 1.** Cell lysates (20  $\mu\text{g}$  per reaction) were pre-incubated with inhibitors (10  $\mu\text{M}$ ) or DMSO as control, and then QStE (10  $\mu\text{M}$ ) was added to measure residual activity ( $\text{Ex} = 410 \text{ nm}$ ,  $\text{Em} = 450 \text{ nm}$ ) over the course of 60 minutes.

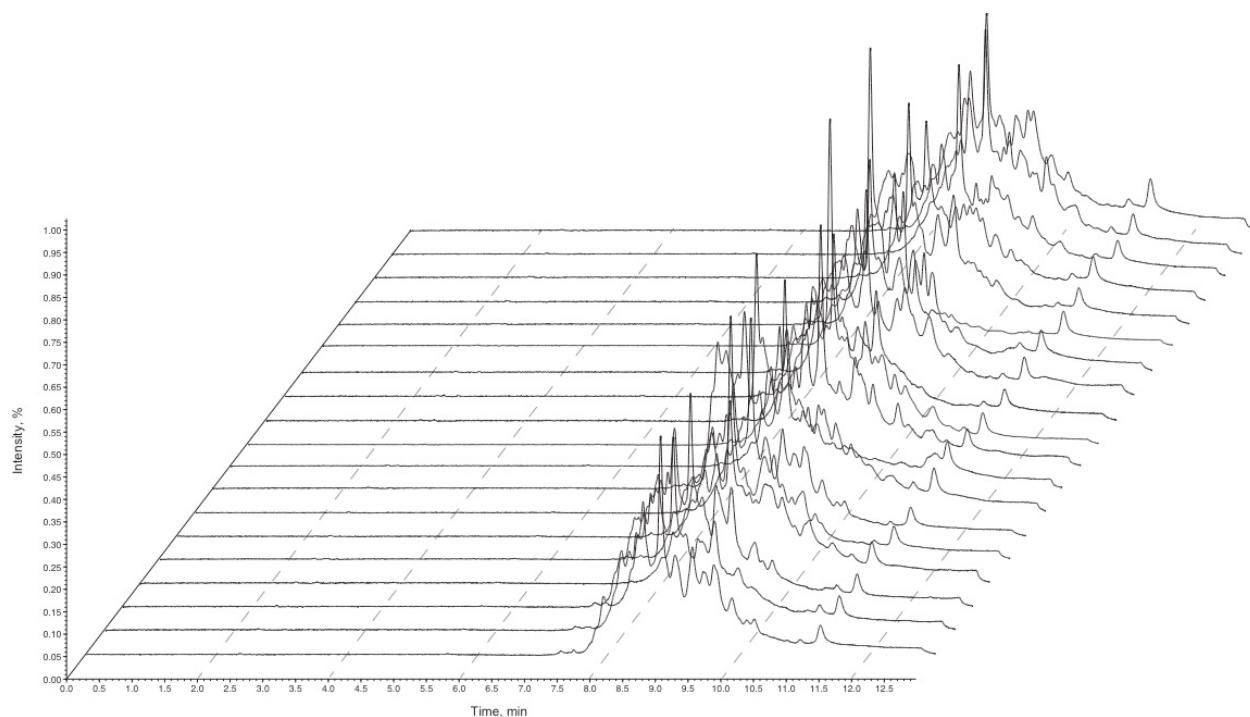

**Figure S4. Determination of library integrity, Related to figures 2 and 4.** Each combinatorial library is composed of 19 samples that correspond to each natural amino acid (excluding cysteine) at the varied position (X). Each sample contains a mixture of 19 peptides that are produced by the isokinetic mixture (IK) used at the position adjacent to X. UV traces of the LCMS analysis of library P2' are depicted, peak distribution and intensities are similar across the samples suggesting equimolar representation of peptide mixtures. UV traces are measured at a wavelength of 500 nm.

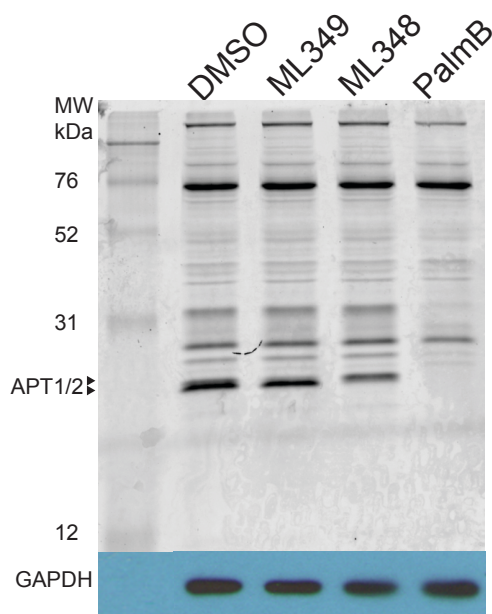

**Figure S5. FP-Rho competition labeling confirms selective inhibition of APT1 and APT2, Related to figure 6.** Tumor tissue lysate (20  $\mu$ g) was incubated with DMSO as control or inhibitors at 10  $\mu$ M for 30 minutes on ice, then 1  $\mu$ M of FP-Rho was added and samples were incubated for additional 20 min on ice. Lysates were resolved by SDS-PAGE, and the gel was scanned for fluorescence (532-nm laser, 610-nm filter, PMT800). Western blot for GAPDH is shown for loading control.

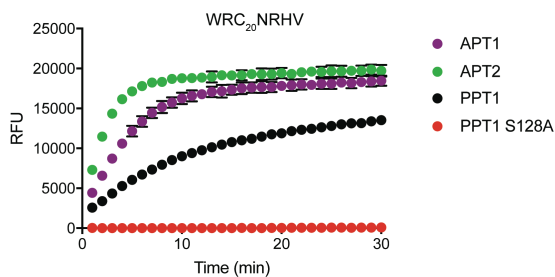

**Figure S6. APT2 exhibits selectivity towards a Scribble-derived peptide sequence, Related to figure 5.** The peptide WRCNRHV was synthesized based on the sequence of human Scribble. Activity of the recombinant depalmitoylases (50 nM) for the hydrolysis of the peptide (1  $\mu$ M) was measured over 30 minutes. Error bars represent the S.D. of three replicates.

## 1) Supplementary Synthesis schemes

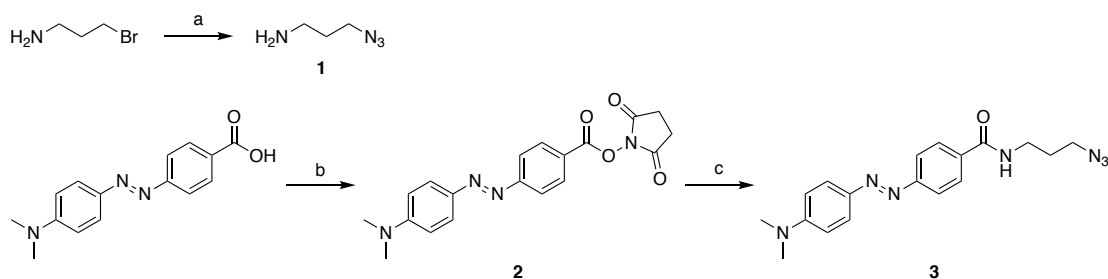

**Scheme S1. Synthesis of DABCYL-azide, Related to Compound Synthesis methods in STAR Method Section.** Reaction conditions; a)  $\text{LiN}_3$ ,  $\text{H}_2\text{O}$ , 12 hr. b) NHS, EDC, DMF, 16 hr. c) 1, DIPEA, DMF, 4 hr.

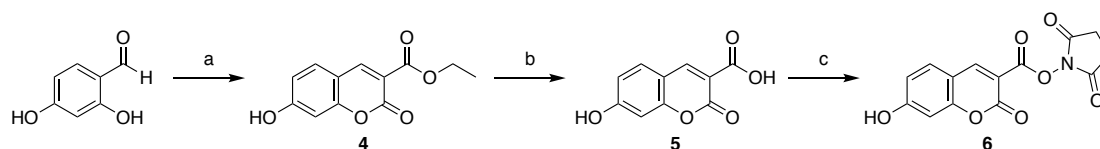

**Scheme S2. Synthesis of 7-Hydroxycoumarin-3-carboxylic acid N-succinimidyl ester, Related to Compound Synthesis methods in STAR Method Section.** Reaction conditions; a) Diethyl malonate, EtOH, piperidine, 12 hr. b) NaOH,  $\text{H}_2\text{O}$ , 1 hr. c) NHS, EDC, DMF, 3 hr.

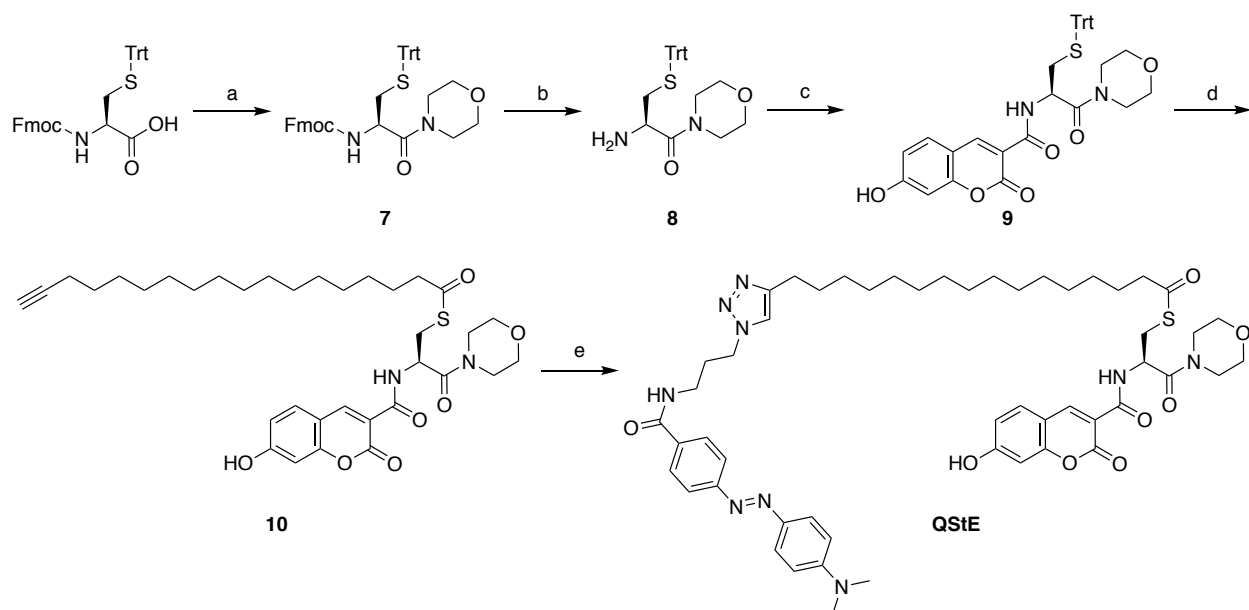

**Scheme S3. Synthesis of QStE. Related to Compound Synthesis methods in STAR Method Section.** Reaction conditions; a) HBTU, Morpholine, DMF, 30 min. b) 20% piperidine, DMF, 30 min. c) **6**, DIPEA, DMF, 4 hr. d) 1. 5% TFA, DCM, 2 hr. 2. 17-ODYA, (COCl)<sub>2</sub>, DMF, DCM 3. TFA, 3 hr. e) **3**, CuSO<sub>4</sub>, L-ascorbic acid, DMF, 40 °C, 2 hr.

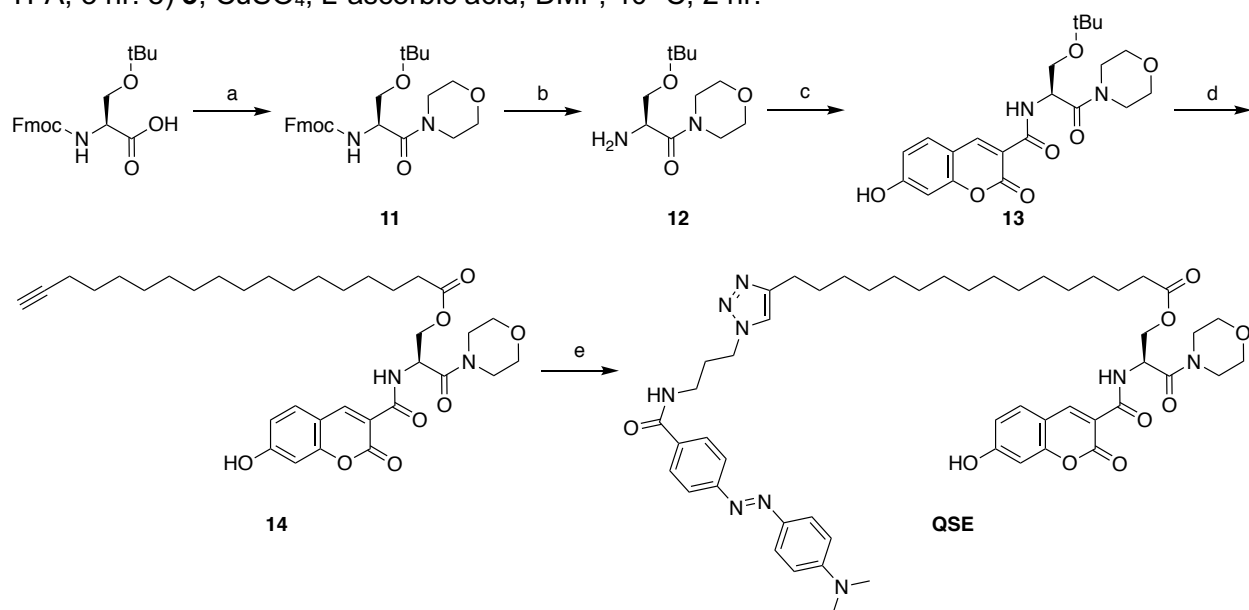

**Scheme S4. Synthesis of QSE. Related to Compound Synthesis methods in STAR Method Section.** Reaction conditions; a) HBTU, Morpholine, DMF, 30 min. b) 20% piperidine, DMF, 30 min. c) **6**, DIPEA, DMF, 4 hr. d) 1. 50% TFA, DCM, 2 hr. 2. 17-ODYA, (COCl)<sub>2</sub>, DMF, DCM 3. TFA, reflux, 4 hr. e) **3**, CuSO<sub>4</sub>, L-ascorbic acid, DMF, 40 °C, 2 hr.

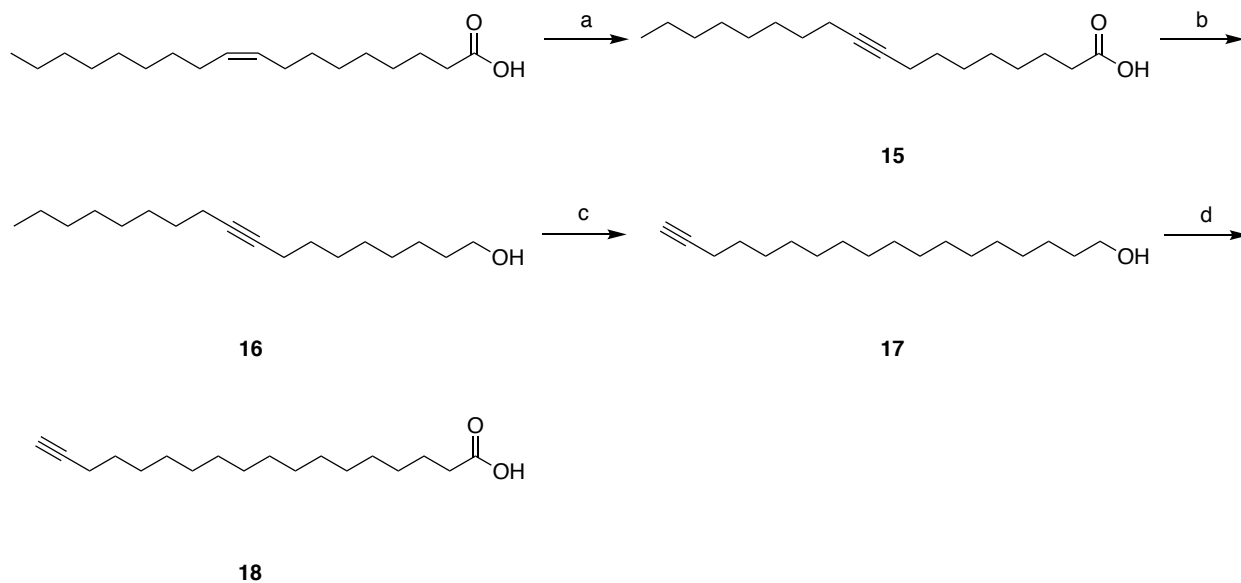

**Scheme S5. Synthesis of 17-ODYA, Related to Compound Synthesis methods in STAR Method Section.** Reaction conditions; a)  $\text{Br}_2$ , KOH, DMSO,  $100^\circ\text{C}$ , 1hr. b)  $\text{LiAlH}_4$ , diethyl ether, 4 hr. c) KH, APA, 16 hr. d) PDC, DMF, 12 hr.

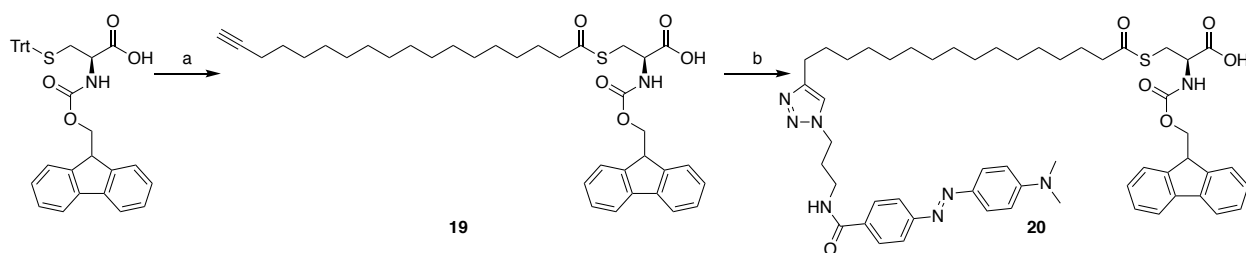

**Scheme S6. Synthesis of cysteine building block ( $\text{C}_{20}$ ), Related to Compound Synthesis methods in STAR Method Section.** Reaction conditions; a) 1. TFA, TIS, DCM 2.  $\text{CHCl}_3$ , 17-ODYA,  $\text{SOCl}_2$ , reflux, 1hr. 3.  $40^\circ\text{C}$ , 4 hr. b)  $\text{Cu(II)SO}_4$ , Ascorbic acid, **3**, DMF,  $40^\circ\text{C}$ , 2 hr.
